# Supplementary material
Source: PubMed Central journal article supplement (PMC4575638)
Supplement: NIHMS708648-supplement-2.pdf [file NIHMS708648-supplement-2.pdf]

**Supplementary Table 1.** List of probes and primers.

| <b>Quantitative PCR</b>               |                                      |
|---------------------------------------|--------------------------------------|
| Ccnd3-Fw                              | 5'-CGC TGC GAG GAG GAT GTC TT-3'     |
| Ccnd3-Rev                             | 5'-CAA CTG CCA TGG AGC CAC AG-3'     |
| Ccnd2-Fw                              | 5'-AGC TGT CCC TGA TCC GCA AG-3'     |
| Ccnd2-Rev                             | 5'-GCA GCT CTG TCA GGG CAT CA-3'     |
| Brwd1-Fw1                             | 5'-GCCTGGTGTTTCAGATGCTGTG-3'         |
| Brwd1-Rev1                            | 5'-GCTGTTCCATCTCGGCTACCA-3'          |
| Brwd1-Fw2                             | 5'-TTGCTTCTGGCAGTGGGATTT-3'          |
| Brwd1-Rev2                            | 5'-GCTTTCAAGCTCGGCGATTT-3'           |
| Brwd1-Fw3                             | 5'-GTGGACGGAAACCCTCATCC-3'           |
| Brwd1-Rev3                            | 5'-CCATTTGCAGTCCCATCCTG-3'           |
| Brwd1-Fw4                             | 5'-GATCCAGCGACTGGCAGACT-3'           |
| Brwd1-Rev4                            | 5'-TGGGGTTGATACGGTTCTTGA-3'          |
| Brwd1-Fw5                             | 5'- CGCCAATGGATTTTGGAAACA-3'         |
| Brwd1-Rev5                            | 5'- CACCAGGGACAGCACCGTTA-3'          |
| Rag1-Fw                               | 5'-CTG CAG ACA TTC TAG CAC TC-3'     |
| Rag1-Rev                              | 5'-AAC TGA AGC TCA GGG TAG AC-3'     |
| Rag2-Fw                               | 5'- TCA TAA GTG AGA AGC CTG GT-3'    |
| Rag2-Rev                              | 5'-CCT TCA GTG CCA AAA TAA GA-3'     |
| Tcf2a-Fw                              | 5'-TCCTTTGACCCTAGCCGGACATAC-3'       |
| Tcf2a-Rev                             | 5'-CCAACACTGGTGTCTCTCCCAAAG-3'       |
| Pax5-Fw                               | 5'-CGCGTGTTTGAGAGACAGCACTACT-3'      |
| Pax5-Rev                              | 5'-GTCTCGGCCTGTGACAATAGGGTAG-3'      |
| Ikzf1-Fw                              | 5'-CACTACCTCTGGAGCACAGC-3'           |
| Ikzf1-Rev                             | 5'-ATAGGGCATGTCTGACAGGCA-3'          |
| Irf4-Fw                               | 5'-CTACCCCATGACAGCACCTT-3'           |
| Irf4-Rev                              | 5'-CCAAACGTCACAGGACATTG-3'           |
| Irf8-Fw                               | 5'-GAGCGAAGTTCCTGAGATGG-3'           |
| Irf8-Rev                              | 5'-TGGGCTCCTCTTGGTCATAC-3'           |
| Smarca4-Fw                            | 5'-AGAAGCTGATTCCTCCGCAAC-3'          |
| Smarca4-Rev                           | 5'-AAGCCTGTA CTCCCGCTCTTG-3          |
| Myc-Fw                                | 5'-GCCCCCAAGGTAGTGATCCT-3'           |
| Myc-Rev                               | 5'-GTGCTCGTCTGCTTGAATGG-3'           |
| B-2 Microglobulin-F                   | 5'-AGACTGATACATACGCCTGCA-3'          |
| B-2 Microglobulin-R                   | 5'-GCAGGTTCAAATGAATCTTCA-3'          |
| Igk-Germline-F                        | 5'-GAGGGGGTTAAGCTTTCGCCTACCCAC-3'    |
| Igk-Germline-R                        | 5'-GTTATGTGCTTCATACTCGTCCTTGGTCAA-3' |
| <b>ChIP- Quantitative PCR</b>         |                                      |
| V <sub>K21-1</sub> -F                 | 5'- TTGTGCTCACCCAATCTCCAG-3'         |
| V <sub>K21-1</sub> -R                 | 5'- GGCTGTCCTGGTTTCTGTTGG-3'         |
| J <sub>K1</sub> - J <sub>K2</sub> -F  | 5'-AGGCACCAAGCTGGAAATCAA-3'          |
| J <sub>K1</sub> - J <sub>K2</sub> -R  | 5'-TGCCTTGGAGAGTGCCAGAAT-3'          |
| J <sub>K4</sub> - J <sub>K5</sub> - F | 5'- GCTCGGGGACAAAGTTGGAA-3'          |

|                                     |                                                                                                          |
|-------------------------------------|----------------------------------------------------------------------------------------------------------|
| J $\kappa_4$ -J $\kappa_5$ --R      | 5'- GATGCACAGGTTGCCAGGAAT-3'                                                                             |
| J $\kappa_5$ - E $\kappa$ i- F      | 5'- TGTTTTAATGGCCACGGTTTTG-3'                                                                            |
| J $\kappa_5$ - E $\kappa$ i- R      | 5'- AGAAGAGGTTGCGGACCGTTT-3'                                                                             |
| E $\kappa$ i- F                     | 5'- GCAGGTGGCCCAGATTACAGT-3'                                                                             |
| E $\kappa$ i- R                     | 5'- AGGGCCTTAAGCCAGGGTCT-3'                                                                              |
| C $\kappa$ -F                       | 5'- TCTGGAGGTGCCTCAGTCGT-3'                                                                              |
| C $\kappa$ - R                      | 5'-CCAACTGTTTCAGGACGCCATT-3'                                                                             |
| 3'E $\kappa$ - F                    | 5'- CCCCACCTCCATCTTGTTTGA-3'                                                                             |
| 3'E $\kappa$ - R                    | 5'- GGGCCCAGTGACCATATCAGA-3'                                                                             |
| Actin $\gamma$ 1-F                  | 5'-CCTCCTCCAATAAAGGGACA-3'                                                                               |
| Actin $\gamma$ 1-R                  | 5'-GCCATCACATCCCAGTCA-3'                                                                                 |
| $\beta$ -globin-F                   | 5'-GCTGCTGGTTGTCTACCCTT-3'                                                                               |
| $\beta$ -globin-R                   | 5'-GCAGAGGCAGAGGATAGGTC-3'                                                                               |
| E $\lambda$ 1-3-F                   | 5'-AAGCTCTGTGGAGGAGGTTG -3'                                                                              |
| E $\lambda$ 1-3-R                   | 5'-AGCTTGTGGACTCTCAAGGG-3'                                                                               |
| E $\lambda$ 2-4-F                   | 5'-TAGGTTGGGGCAGAGAGATG-3'                                                                               |
| E $\lambda$ 2-4-R                   | 5'-GCTTGTGGATTCTCAAGGGT-3'                                                                               |
| Ig $\lambda$ J1-F                   | 5'-GATCTTTCAGTGATGTCACCACC-3'                                                                            |
| Ig $\lambda$ J1-R                   | 5'-GCACCTCAAGTCTTGGAGAGAAC-3'                                                                            |
| Ig $\lambda$ J2-F                   | 5'-CCACCCACTGCTTCTCAAGTG-3'                                                                              |
| Ig $\lambda$ J2-R                   | 5'-AGACAACAAGGGCTGGGCTTA-3'                                                                              |
| <b>Short Hairpin RNA Constructs</b> |                                                                                                          |
| shRNA-Brwd1-4 (target seq)          | 5'-CGGATCTGTATCACTAGAGAA-3'                                                                              |
| shRNA-Brwd1-4 (97mer)               | 5'-GCTGTTGACAGTGAGCGCCGGATCTGTATCACTAGAGAAATAGTGAAGCCACAGATGATTTCTCTAGTGATACAGATCCGTTGCCTACTGCCTCGGA -3' |
| <b>Kappa Recombination</b>          |                                                                                                          |
| degV $\kappa$                       | 5'-GGC TGC AGS TTC AGT GGC AGT GGR TCW GGR AC-3'                                                         |
| MAR (Ig $\kappa$ intron)            | 5'-AAC ACT GGA TAA AGC AGT TTA TGC CCT TTC-3'                                                            |
| $\kappa$ -meth-F                    | 5'-ATG ACC CAG AGG ATG AAA C-3'                                                                          |
| $\kappa$ -J1-R                      | 5'-AGC ATG GTC TGA GCA CCG AGT AAA GG-3'                                                                 |
| E $\kappa$ i-F                      | 5'-AGA AGT GAA GTC TGC CAG TT-3'                                                                         |
| E $\kappa$ i-R                      | 5'-GTA ACC ACA TGG GAC AAT TT-3'                                                                         |
| <b>J<math>\kappa</math> Usage</b>   |                                                                                                          |
| V $\kappa$ -FW                      | 5'-AGCTTCAGTGGCAGTGGRTCWGGGRAC-3'                                                                        |
| C $\kappa$                          | 5'-CTTCCACTTGACATTGATGTC-3'                                                                              |

**Supplementary Table 2.** ATAC-seq alignment statistics.

|                                         | WT1       |       | WT2       |       | Mut1      |       | Mut2      |       |
|-----------------------------------------|-----------|-------|-----------|-------|-----------|-------|-----------|-------|
| Raw reads-pair 1                        | 70156781  |       | 83648534  |       | 86821861  |       | 96234426  |       |
| Raw reads - Pair 2                      | 70156781  |       | 83648534  |       | 86821861  |       | 96234426  |       |
| Trimmed reads - Pair 1                  | 70066574  | 99.9% | 83511078  | 99.8% | 86710495  | 99.9% | 96048959  | 99.8% |
| Trimmed reads - Pair2                   | 69455097  | 99.0% | 82600240  | 98.7% | 85797411  | 98.8% | 95175630  | 98.9% |
| Complete pairs after trimming           | 67865040  | 97.7% | 80604130  | 97.6% | 83726404  | 97.6% | 92736672  | 97.4% |
| Aligned reads                           | 132317198 | 97.5% | 157384650 | 97.5% | 163040856 | 97.4% | 181760794 | 98.0% |
| High quality, unique aligned reads      | 105123120 | 77.5% | 123169530 | 76.4% | 97989782  | 58.5% | 111467428 | 60.1% |
| High quality, unique, paired alignments | 50530138  | 74.5% | 58928062  | 73.1% | 46873182  | 56.0% | 53354561  | 57.5% |

From WT and *Brwd1*<sup>mut</sup> (Mut) small pre-B cells, duplicate samples were obtained. The WT samples had 1.3-1.6 x 10<sup>8</sup> aligned reads (~97.5% of total sequences) and *Brwd1*<sup>mut</sup> samples had 1.6-1.8 x 10<sup>8</sup> aligned reads (~97.7%). ATAC-Seq profiles were highly reproducible between biological replicates (Spearman's r=0.99).

**Supplementary Table 3.** Cryptic RSS (cRSS) and GAGA motifs in open+6-ChIP-seq peaks ( $P < 10^{-7}$ ).

| Sequence under common region of peaks                                                                                                                                                                                                                                                                                                                    | Location                             | Gene                                | Where the peak is | Chromatin remodeling         |
|----------------------------------------------------------------------------------------------------------------------------------------------------------------------------------------------------------------------------------------------------------------------------------------------------------------------------------------------------------|--------------------------------------|-------------------------------------|-------------------|------------------------------|
| <p>AGGAATGTCGAAATTACTGAAAAACGTGAAAAATGAGAAATGCACACTGCAG<br/> GACCTGGAATATGGCGAGAAACTGAACATCACGGAAAATGAGAATAACACT<br/> CTTTAGGTAGTGAAATATGACGAGAAATATTGAAAAATAAGC</p> <p>No RSS</p>                                                                                                                                                                       | chr4<br>70039147<br>To<br>70039293   | <i>Cdk5rap2</i><br>(Protein coding) | Intron 4 of<br>36 | Yes<br>(Nucleosome shifting) |
| <p>CCAACGGATGTGTTTTTCAGTGTAACCTCACTCATCTAATATGTTCTACAGTGT<br/> GGTTTTTATCATTTTCCATGTTCCCTCATTGTAACCTCATTGATATACACTGTTTC<br/> TACAATTCCCGTTTCCAACGAATGTGTTTTTCAGTGTAACCTCACTCATCTAATA<br/> TGTTCTACAGTGTGGTTTTTATCATTTTCCATGTTTCTCATTGTAACCTCATTGA<br/> TATACTGTTCTACAAATCCCGTTTCTATA<br/> (RIC score -38.02)- RSS12 sequence; + strand</p>               | chr6<br>103599044<br>to<br>103599290 | <i>Chl</i><br>(Protein coding)      | Intron 4 of<br>26 | No                           |
| <p>NNNGATCCTACAGTGTGCATTTCTCATTTTTCACGTTTTTCAGTGATTTTCGT<br/> CATTTTTCAAGTCATCAAGTGGCTGTTTCTCATTTTCCATGATTTTCAGTTTTTC<br/> TTGCCATATTCCTTGTCCTACAGTGGACATTTCTAAATTTCCACCTTTTTTCAG<br/> TTTTCTTGTCATATTTTCAGGTCCTACAGTGTGATTTTCTCATTTTTCACGTTT<br/> TTCATTGATTTTCGTCATTTTTCAAGTTGTCAAGTGCATGTTTCTCATTTTCCAT<br/> GATTTTCAGTTTTCTTGCCATA</p> <p>No RSS</p> | chr9<br>2999996<br>To<br>3000287     | Mir101c<br>miscRNA                  | Intergenic        | No                           |
| <p>GTGATTTTCTCATTTTCCGTGATTTTTCAGTTTTCTCGACATATTCCAGGTCCTA<br/> CAGTGTGCATTTTCTCATTTTTCACGTTTTTCAGTGATTTTCGTCATTTTTTCAGT<br/> CGTCAAGTGGATGTTTCTCATTTTCCATGATTTTTCAGTTTTCTTGCCAT</p> <p>No RSS</p>                                                                                                                                                       | chr9<br>3000363<br>to<br>3000520     | Mir101c                             | Intergenic        | No                           |
| <p>TATTTACGTCCTAAAGTGTGATTTTCTCATTTTCCGTGATTTTTCAGTTTTATC<br/> GCCAGATTCCAGGTCCTACGGTGTGCA</p> <p>No RSS</p>                                                                                                                                                                                                                                             | chr9<br>3000989<br>to<br>3001070     | Mir101c                             | Intergenic        | No                           |

|                                                                                                                                                                                                                                                                                                                                                                                                                                                                                     |                                       |                                       |            |                                                 |
|-------------------------------------------------------------------------------------------------------------------------------------------------------------------------------------------------------------------------------------------------------------------------------------------------------------------------------------------------------------------------------------------------------------------------------------------------------------------------------------|---------------------------------------|---------------------------------------|------------|-------------------------------------------------|
| TGAAAATGATAAAAACCACACTGTAGAACAGAGTAGATGAGTGAGTTACAC<br>TGAAAACACAATTCGTTGAAACGGGAATTGTGTATATCAATGAGTTACTAG<br>GAGAAACATGGAAAATGATAAAAAC<br>No RSS                                                                                                                                                                                                                                                                                                                                   | chr9<br>24346459<br>to<br>24346589    | <i>Dpy19l1</i><br>(Protein<br>coding) | Intergenic | No                                              |
| TTTTGAGGTGCACACTGAAGGACCTGGAATTATGCGAGAAAACCTGAAAATCA<br>CGAAAATGAGAAATACACACTTTTAGGACGTGAAAATGGCGAGGAAAACCTG<br>AAAAGGTGAAAATTTAGAAATGTCCTCTGTAGGACATGGAATATGGCAAG<br>AAAACCTGAAAATCATGGAAAATGAGAAACATCCACTTTGATGACTTGAAAATG<br>ACGAAATCATTAAAAACGTGAAAATGAGAAATGCCACTGAAGGACCTGG<br>AATATGGGGAGAAAACCTGAAAATCACGGAAAATGAGAAATACACACTTTAGG<br>ACGTGAAATATGGCGAGGAAAACCTGAAAAGGTGGAATATTTAGAAATGTCC<br>ACTGTAGGACCTGGAATATAAGT<br>No RSS                                            | chr9<br>35112792<br>to<br>35113180    | Rik<br>4933422A05                     | Intergenic | Yes<br>(Nucleosome<br>Depletion)                |
| GTTTTACCTACATTGTTCCAACATGCCAGAGGCTGTTACCTTGAGACCTG<br>CTGCGGATATGGGTACGGCCCGAGATTTACAAGCTCTCCCCGGATTTTTCA<br>AGGGCCAGCGAGAGCTCACCGGATGCCGCCGAACCATGACGCTTTCCAA<br>GGCAGTGCCCTCTCTCAGGGCGAACCCATTCCAGGGCGCCCTGCCCTTC<br>ACAAAGAAAGAGAACTCTCCCCGGGGCTTCTCCGGGATCGGTCGCGTTAC<br>CGCACTGGACGCCTCGCGGCGCCCATCTCCGCCACTCTGATTTGGGATC<br>TGAACCCGACTCCCTTCAATCGGCCGAGGGCAACGGAGGCCATCGCCCAT<br>CCCTTCGGAACGGCACTCACCCATCTCTCAGGACTGACTGACCCATGTTAA<br>C<br>No RSS                          | chr11<br>108872956<br>to<br>108873367 | <i>Axin2</i><br>(Protein<br>coding)   | Intergenic | Yes,<br>Nucleosome<br>shifting<br>and depletion |
| CTGAAATCATGGAAAATGAGAAACATCCACTTGACGACTTGAAAATGACAA<br>AATCACTGAAAAGGTGAAAATGAGAAATGCACACTGTAGGACTTGAATA<br>TGCGGAGAAAACCTGAAAATCACGGAAGTGAGGG<br>No RSS                                                                                                                                                                                                                                                                                                                            | chr12<br>3109990<br>to<br>3110128     | Rik<br>1700012B15                     | Intergenic | Yes<br>Nucleosome<br>depletion                  |
| AGAGTCTGCTATTTCAAAGCATAAGGAAAAGTAGGAGAAAACGTGAGGCT<br>GTTTGTGGATGGTCGAGGCTGCTTTAGGGAGCCTCCTACCATTTCTGCACTT<br>GCAAACCGGGCCACTAGAACCCTGTGAAGGGAGAAACCAAAGCGACCTGAA<br>ACAATAGGTCACATGAAGGCCAGCCACCTCCATCTTGTGTGCAGGAGTTCA<br>GTTAGCAGACAAGATGGCTGCCATCCACATGTCACCTTTTCATCTTGGTGAGG<br>TCAATGTGCAGCCGAGTGACAGGACAAGGAAGTAGACATGCAGACAACAGA<br>CATGCAGGCCAACCACCTCCCTTCTGTGTTTGGATAAAAGACATAACAACAT<br>TTTTATTTTTTACAGTAAGCCTTAAAAAGCACTCTGACAGCCACTCAGATATCT<br>ACCTTCTATGT<br>No RSS | chr15<br>74917050<br>To<br>74917477   | <i>Ly6c2</i><br>(Protein<br>coding)   | Intergenic | Yes<br>Nucleosome<br>depletion                  |

|                                                                                                                                                                                                                                                                                                                                                                                                                                                                                                                                                                                                                                                                                                                                                                                                                                                                                                                                                                                                                                     |                                                          |                                                         |                           |                                           |
|-------------------------------------------------------------------------------------------------------------------------------------------------------------------------------------------------------------------------------------------------------------------------------------------------------------------------------------------------------------------------------------------------------------------------------------------------------------------------------------------------------------------------------------------------------------------------------------------------------------------------------------------------------------------------------------------------------------------------------------------------------------------------------------------------------------------------------------------------------------------------------------------------------------------------------------------------------------------------------------------------------------------------------------|----------------------------------------------------------|---------------------------------------------------------|---------------------------|-------------------------------------------|
| <p>CTCTAGATAACCTCGGGCCGATCGCACGCCCCCGTGGCGGCGACGACCCAT<br/> TCGAACGTCTGCCCTATCAACTTTTCGATGGTAGTCGCCGTGCCTACCATGGT<br/> GACCACGGGTGACGGGGAATCAGGGTTCGATTCGGAGAGGGAGCCTGAG<br/> AAACGGCTACCACATCCAAGGAAGGCAGCAGCGCGCAAATTACCCACTCC<br/> CGACCCGGGGAGGTAGTGACGAAAATAACAATAACAGGACTCTTTCGAGGC<br/> CCTGTAATTGGAATGAGTCCACTTTAAATCCTTTAACGAGGAT<br/> No RSS</p>                                                                                                                                                                                                                                                                                                                                                                                                                                                                                                                                                                                                                                                                          | <p>chr17<br/> 39983597<br/> To<br/> 39983895_<br/> +</p> | <p>Rn45s<br/> Non coding<br/> RNA</p>                   | <p>Intergenic</p>         | <p>Yes<br/> Nucleosome<br/> depletion</p> |
| <p>CATAACGATGCCGACTGGCAATGCGGCGGCGTTATTCCCATGACCCGCCG<br/> GGCAGCTTCCGGGAAACCAAAGTCTTTGGGTTCCGGGGGGAGTATGGTTGC<br/> AAAGCTGAAACTTAAAGGAATTGACGGAAGGGCACCACCAGGAGTGGAGCC<br/> TGC GGCTTAATTTGACTCAACACGGGAAACCTCACCCGGCCCGGACACGGA<br/> CAGGATTGACAGATTGATAGCTCTTCTCGATTCCGTGGGTGGTGGTGCATG<br/> GCCGTTCTTAGTTGGTGGAGCGATTTGTCTGGTTAATTCCGATAACGAACGA<br/> GACTCTGGCATGCTAACTAGTTACGCGACCCCGAGCGGTGCGCGTCCCCC<br/> AACTTCTTAGAGGGACAAGTGGCGTTCAGCCACCCGAGATTGAGCAATAACA<br/> GGTCTGTGATGCCCTTAGATGTCCGGGGCTGCACGCGCGCTACACTGACTG<br/> GCTCAGCGTGTGCCTACCCTACGCCGGCAGGCGCGGGTAACCCGTTGAAC<br/> CCCATTCTGTGATGGGGATCGGGGATTGCAATTATCCCATGAACGAGGAAT<br/> TCCAGTAAGTGCGGGCCATAAGCTTGC GTTGATTAAGTCCCTGCCCTTTGT<br/> ACACACCGCCCGTCGCTACTACCGATTGGATGGTTTAGTGAGGCCACGGC<br/> CCTGGTGGAGCGCTGAGAAGACGTGCGAACTTGACTATCTAGAGGAAGTAA<br/> AAGTCGTAACAAGTTTTCCGTAGGTGAACCTGCGGAAGGATCATTACGGGA<br/> GACTGTGGAGGAGCGGCGGCGTGGCTCGCTCTCCCCGTCTTGTGTGTGTCC<br/> TCGCCGGGAGGCGCGTGGTCCCCGGG<br/> (RIC score -58.24)- RSS23 sequence; - strand</p> | <p>chr17<br/> 39984382<br/> To<br/> 39985229</p>         | <p>Rn45s<br/> Non coding<br/> RNA</p>                   | <p>Intergenic</p>         | <p>Yes<br/> Nucleosome<br/> depletion</p> |
| <p>ATTCACCTACTCATTCCGTCTCTCCCAAGGGTCCTCCCTAGCTCAGGGCGGG<br/> GCACTCACGCACACATGACAGAGCAGCGTACCCACCCACCACTTCTCCCGA<br/> GTGGCACAACGGTCCCCATCGTCCC GCCGAACATAGCGAACACGCGGCTG<br/> GACTCGGGCACCCAAAACGAAAGTATGACAGGGAGCTGTGAAAACAGGCG<br/> AAATCATT<br/> No RSS</p>                                                                                                                                                                                                                                                                                                                                                                                                                                                                                                                                                                                                                                                                                                                                                                     | <p>chr19<br/> 61275523<br/> To<br/> 61275736</p>         | <p>Gm7102<br/> (Predicted<br/> protein<br/> coding)</p> | <p>Intergenic</p>         | <p>Yes<br/> Nucleosome<br/> depletion</p> |
| <p>ACACTGTAGAACATAGTGTGAAATGCACATTGTAAAACACAGTATGTTAATGA<br/> GTTGCACTGAAAACAGAAATGGGAAATGCACAGTGTAGAACC CAATATAT<br/> GAGTGAGTTGCACTGAAACACCTAGAAAATCAGACC GG CACATTGTAGAACA<br/> TAGTGTGAAATGCACATTGTA AACACAGGATGTTAATGAGTTGCACTGAAAA<br/> ACATAGAAAATGGAAATGCACAGTGTAGAACATTGTATATGAGTGCTTTGCA<br/> CTGAACAACCTAGAAAAAAAAGA<br/> (RIC score -37.99), RSS12 sequence; + strand<br/> (RIC score -56.25), RSS23 sequence; + strand</p>                                                                                                                                                                                                                                                                                                                                                                                                                                                                                                                                                                                             | <p>chrX<br/> 73844194<br/> to<br/> 73844480</p>          | <p>Rik<br/> 4930468A15</p>                              | <p>Intron 1 of<br/> 1</p> | <p>Yes<br/> Nucleosome<br/> depletion</p> |

|                                                                                                                                                                                  |                                      |                             |            |    |
|----------------------------------------------------------------------------------------------------------------------------------------------------------------------------------|--------------------------------------|-----------------------------|------------|----|
| GAGTTTCTCATTGTAAC <b>CATTGATATACACTGTTCTACAATGCCCGTTTCCA</b><br>ACGTATGTGTTTTTCAGTGTAAC <b>CTCATCTAATATGTTCTACAGTGTGGTT</b><br>A<br>(RIC score -38.20), RSS12 sequence; + strand | chrX<br>139917545<br>to<br>139917653 | Pak3<br>(Protein<br>coding) | Intergenic | No |
|----------------------------------------------------------------------------------------------------------------------------------------------------------------------------------|--------------------------------------|-----------------------------|------------|----|

The RIC (RSS Information Content) score goes from -1000 (very bad) to 0 (very good). It has been shown that there is a good correlation between this score and the RSS functionality. For the current version, pass/fail RIC thresholds are from Cowell et al (2002) as follows: 12 RSS: pass with RIC > -38.81; 23 RSS: pass with RIC > -58.45

GAGA motifs: (C/G)A(C/G)A(C/G)A.... or (G/C)T(G/C)T(G/C)T....)
